# Supplementary material for: Atypical Hemolytic Uremic Syndrome Treated With Ravulizumab or Eculizumab: A Claims-Based Evaluation of Health Care Resource Utilization and Clinical Outcomes in the United States
Source: PubMed Central journal article supplement — Kidney Med. 2023 May 31;5(8):100683. doi: 10.1016/j.xkme.2023.100683 (PMC10319830; doi:10.1016/j.xkme.2023.100683), 2023-05-31
Supplement: mmc1.pdf [file mmc1.pdf]

**Figure S1.** Total median healthcare costs (excluding eculizumab/ravulizumab prescriptions) before and after the index date for adult patients who switched from eculizumab to ravulizumab or adult patients receiving eculizumab.

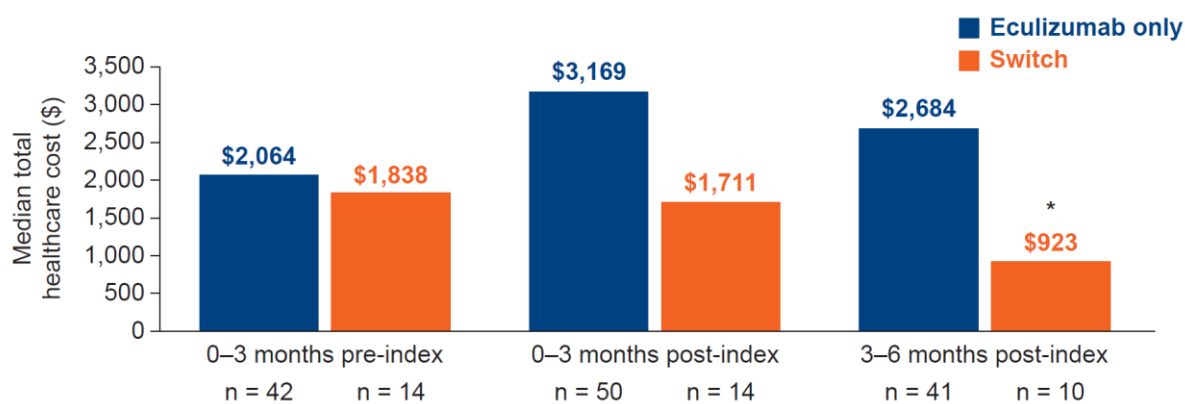

\*  $P < 0.05$  (analyzed for 0-3 months pre-index vs 0-3 months post-index and for 0-3 months pre-index vs 3-6 months post-index for each treatment individually). The n values vary because only patients with  $\geq 80\%$  relevant submitted medical claims that could be linked to paid remit claims in each time period were included in the analysis; no adult patients receiving ravulizumab only met this requirement. The outcomes analyses required at least 6 months of continued eculizumab/ravulizumab use after the index date.

**Table S1.** Diagnostic codes for inclusion and exclusion criteria

| Inclusion/exclusion criteria                                                                  | Diagnostic codes                                                                                                                                                                                                                                                                                                                                                                                                                                                                                                                               |
|-----------------------------------------------------------------------------------------------|------------------------------------------------------------------------------------------------------------------------------------------------------------------------------------------------------------------------------------------------------------------------------------------------------------------------------------------------------------------------------------------------------------------------------------------------------------------------------------------------------------------------------------------------|
| At least one medical or pharmacy claim for treatment with:                                    |                                                                                                                                                                                                                                                                                                                                                                                                                                                                                                                                                |
| Eculizumab                                                                                    | HCPCS J1300<br>NDC 25682-0001-01                                                                                                                                                                                                                                                                                                                                                                                                                                                                                                               |
| Ravulizumab                                                                                   | HCPCS J1303<br>HCPCS C9052<br>NDC 25682-0022-01<br>NDC 25682-0025-01<br>NDC 25682-0028-01<br>HCPCS J3590 AND NDC code 25682-0022-01, 25682-0025-01, or 25682-0028-01                                                                                                                                                                                                                                                                                                                                                                           |
| At least one medical claim with diagnosis codes that may be relevant to the diagnosis of aHUS | ICD-9 282.8 (other specified hereditary hemolytic anemias)<br>ICD-9 283.10 (non-autoimmune hemolytic anemia, unspecified)<br>ICD-9 283.11 (hemolytic uremic syndrome)<br>ICD-9 283.19 (other non-autoimmune hemolytic anemias)<br>ICD-10 D58.8 (other specified hereditary hemolytic anemias)<br>ICD-10 D59.4 (other non-autoimmune hemolytic anemias)<br>ICD-10 D59.3 (hemolytic uremic syndrome)<br>ICD-10 D59.8 (other acquired hemolytic anemias)<br>ICD-9 446.6 (thrombotic microangiopathy)<br>ICD-10 M31.1 (thrombotic microangiopathy) |

| Inclusion/exclusion criteria                                                          | Diagnostic codes                                                                                                       |
|---------------------------------------------------------------------------------------|------------------------------------------------------------------------------------------------------------------------|
| No evidence of other indicated conditions:                                            | Exclusionary codes:                                                                                                    |
| Paroxysmal nocturnal hemoglobinuria                                                   | ICD-9 283.2<br>ICD-10 D59.5                                                                                            |
| Myasthenia gravis                                                                     | ICD-9 358.00<br>ICD-9 358.01<br>ICD-10 G70.00<br>ICD-10 G70.01                                                         |
| Neuromyelitis optical spectrum disorder                                               | ICD-9 341.0<br>ICD-10 G36.0                                                                                            |
| No evidence of Shiga toxin <i>Escherichia coli</i> -related hemolytic uremic syndrome | Exclusionary codes:<br>ICD-9 041.41<br>ICD-9 041.42<br>ICD-9 041.43<br>ICD-10 B96.21<br>ICD-10 B96.22<br>ICD-10 B96.23 |

---

Abbreviations: aHUS, atypical hemolytic uremic syndrome; HCPCS, Healthcare Common Procedure Coding System; ICD, International Classification of Diseases; NDC, National Drug Code.
